# Supplementary material for: Design, Synthesis and Molecular Modeling of Benzofuran-8-Hyroxyquinoline Hybrids as Multi-Target Inhibitors and Potential Anti-Alzheimer’s Disease
Source: Preprints.org preprint supplement (doi:10.20944/preprints202402.0731.v1), 2024-02-13
Supplement: Supplementary file 1 [file supplementary]

PROTON CDCl3 D:\labari 7

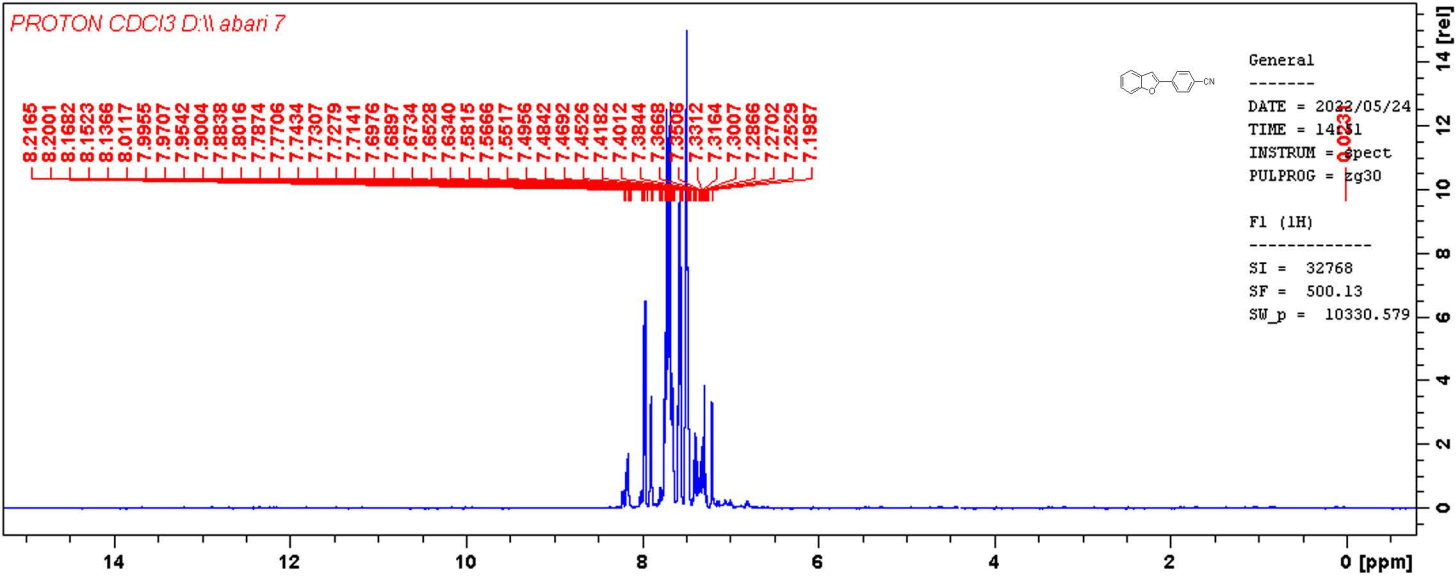

PROTON CDCl<sub>3</sub> D:\labari 10

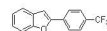

General

DATE = 2022/05/24

TIME = 15:12

INSTRUM = spect

PULPROG = zg30

F1 (1H)

SI = 32768

SF = 500.13

SW<sub>p</sub> = 10330.579

8.0020  
7.9860  
7.9633  
7.9472  
7.8535  
7.8373  
7.7354  
7.7191  
7.6867  
7.6643  
7.6529  
7.6191  
7.6027  
7.5827  
7.5665  
7.5359  
7.5201  
7.4930  
7.4812  
7.4648  
7.4502  
7.3788  
7.3767  
7.3622  
7.3526  
7.3482  
7.3453  
7.3384  
7.3237  
7.3042  
7.2867  
7.2757  
7.2123  
7.1975  
7.1695

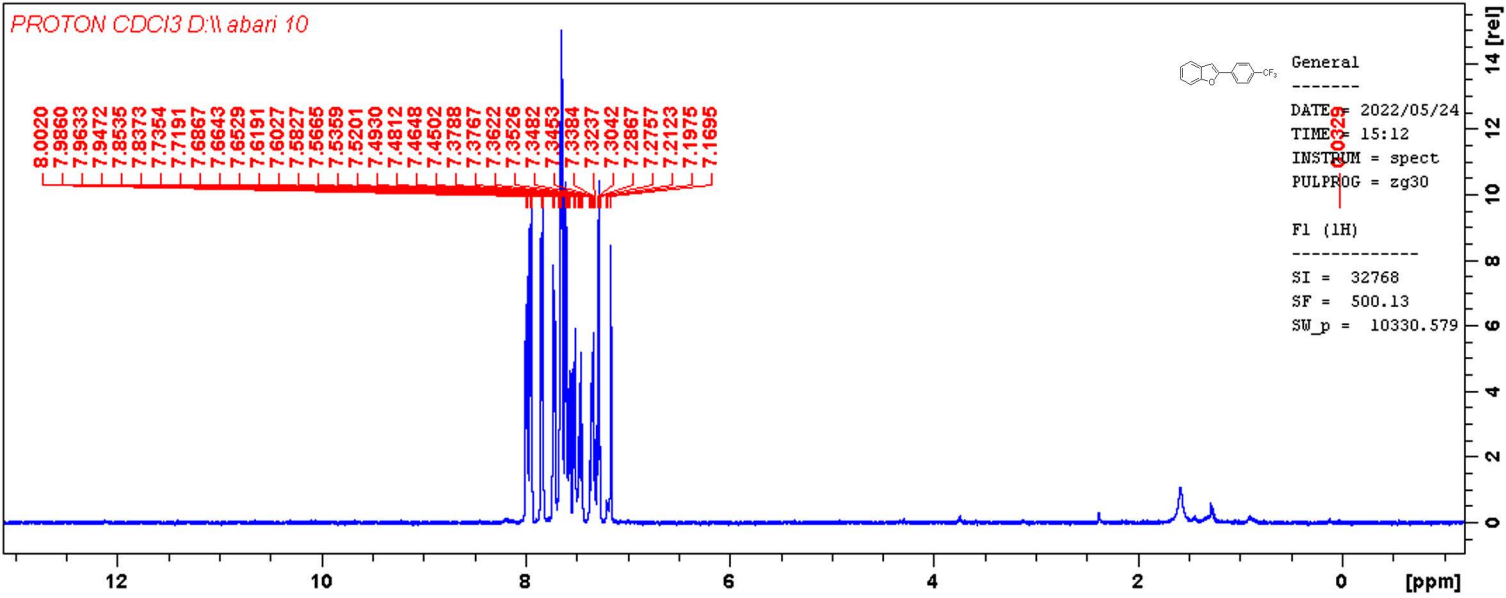

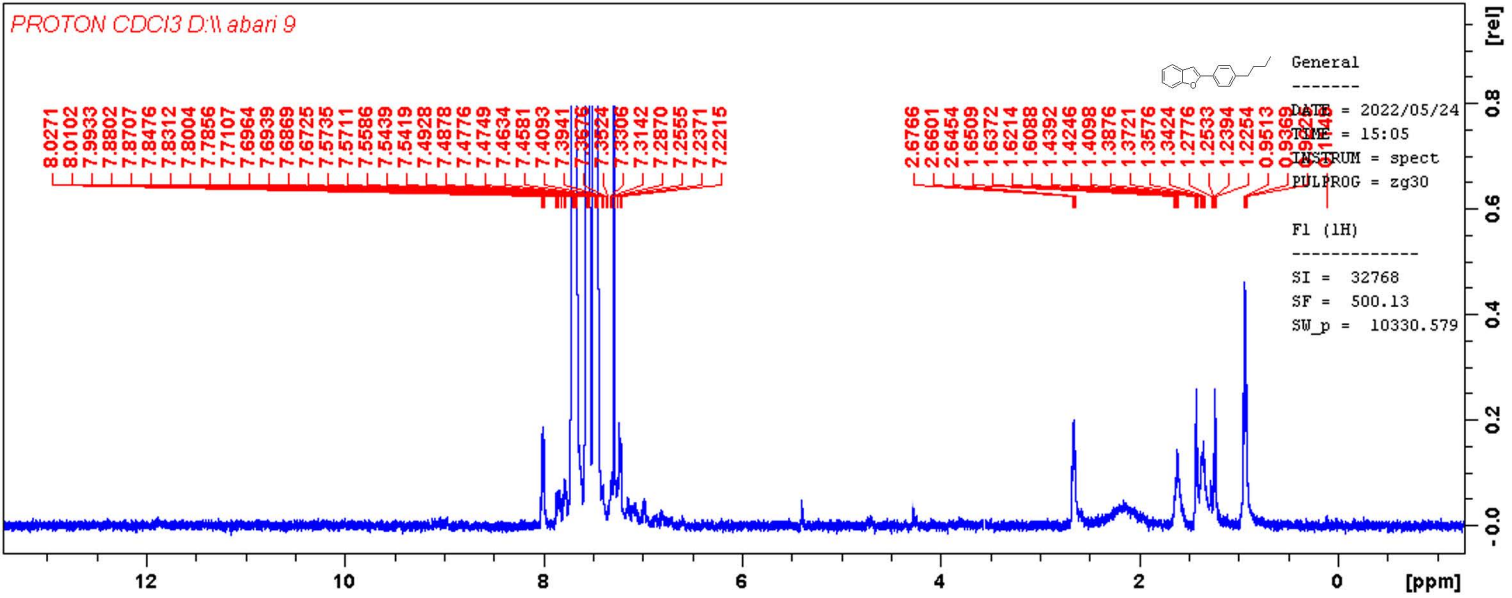

PROTON CDCl3 D:\labari 8

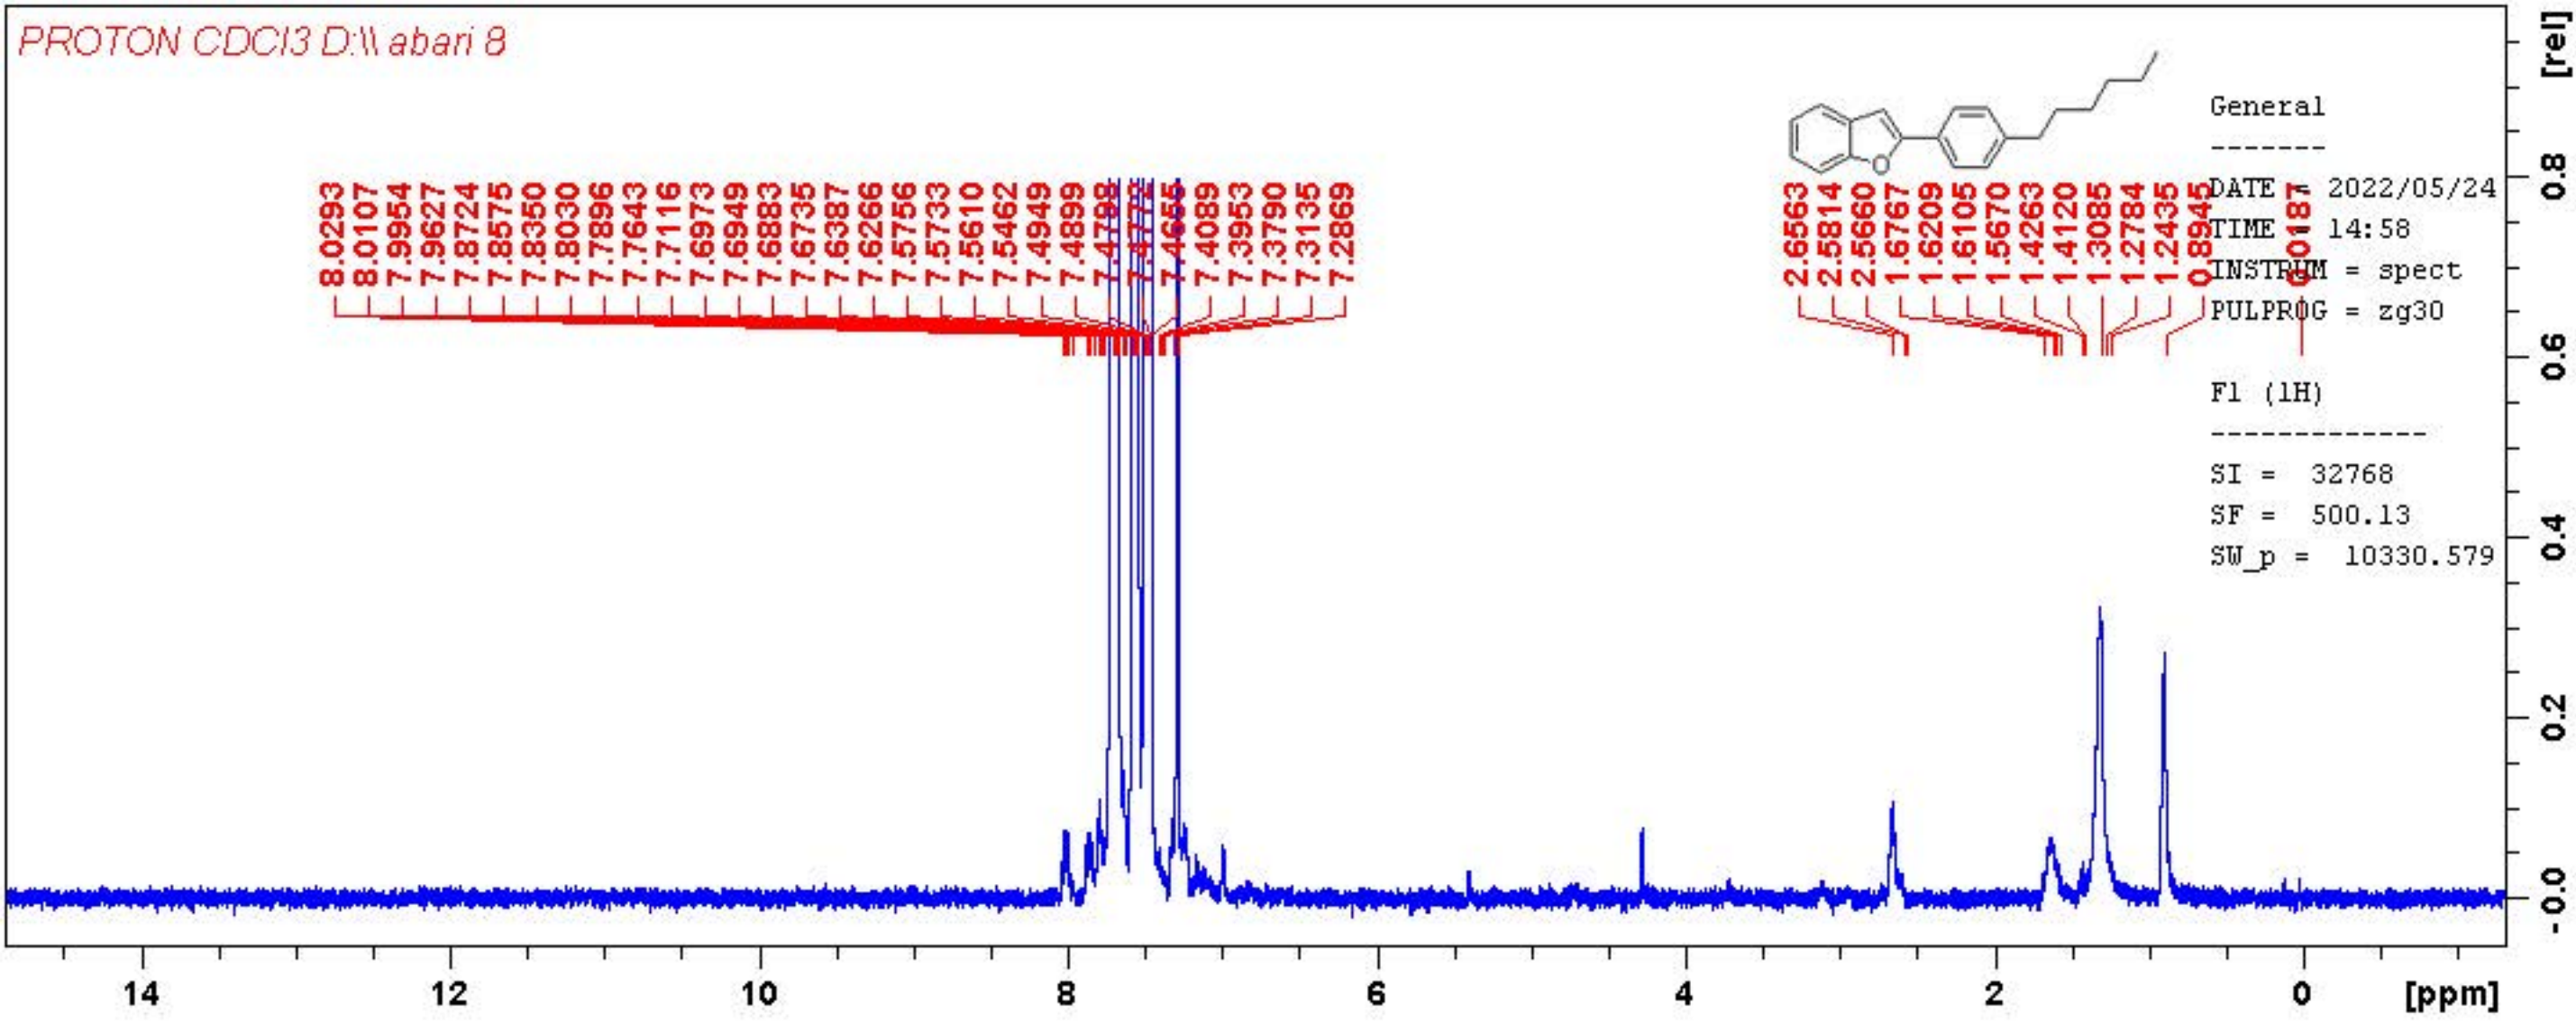

PROTON CDCl3 D:\labari 11

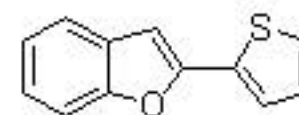

General

DATE = 2022/05/24

TIME = 15:20

INSTRUM = spect

PULPROG = zg30

F1 (1H)

SI = 32768

SF = 500.13

SW\_p = 10330.579

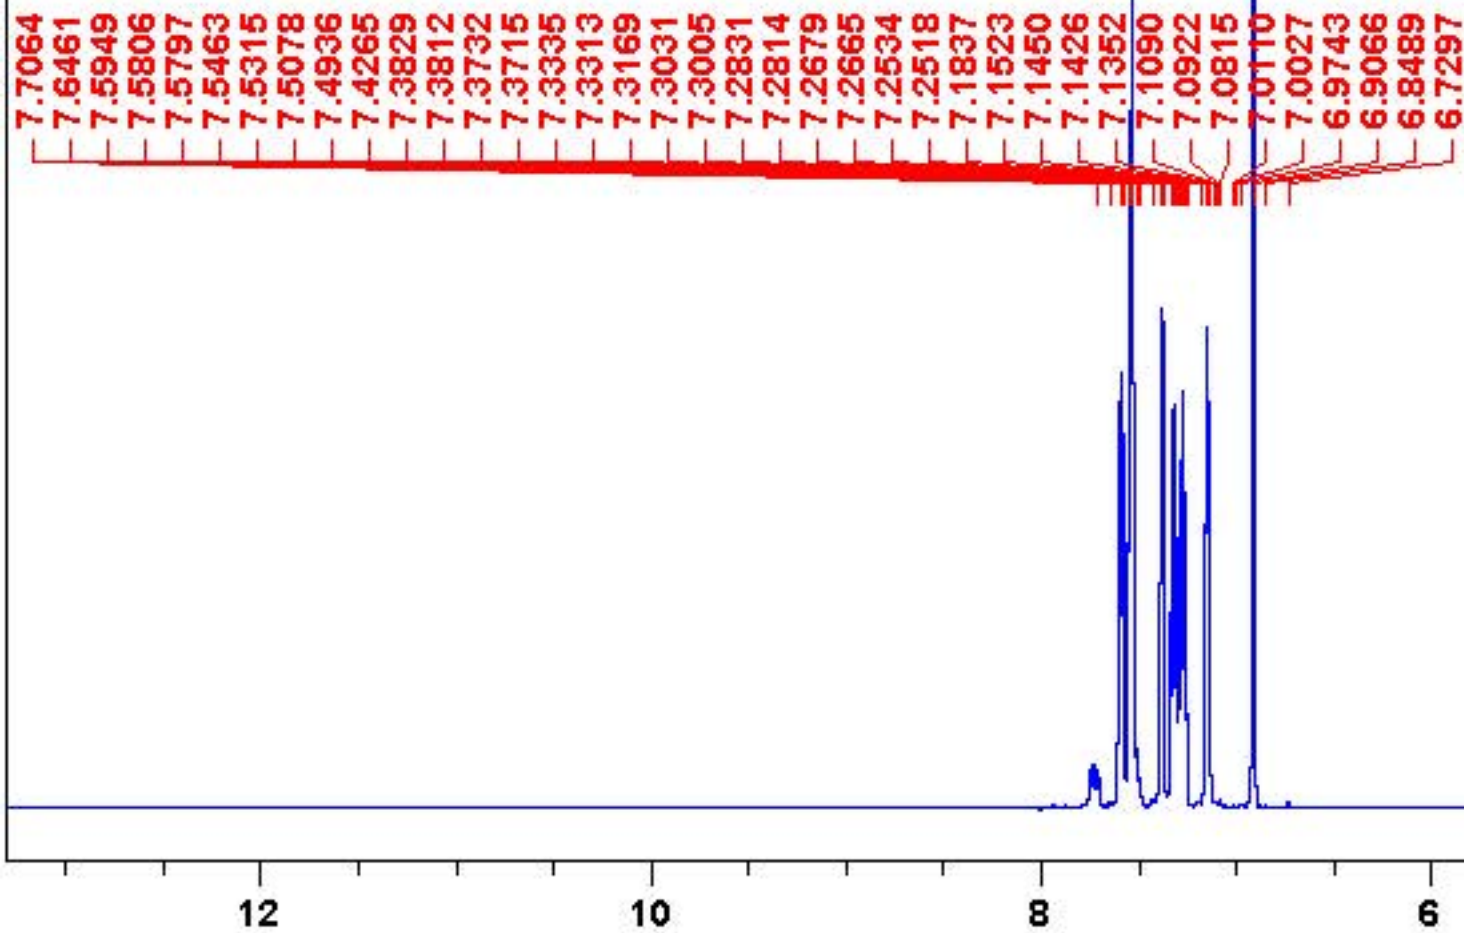

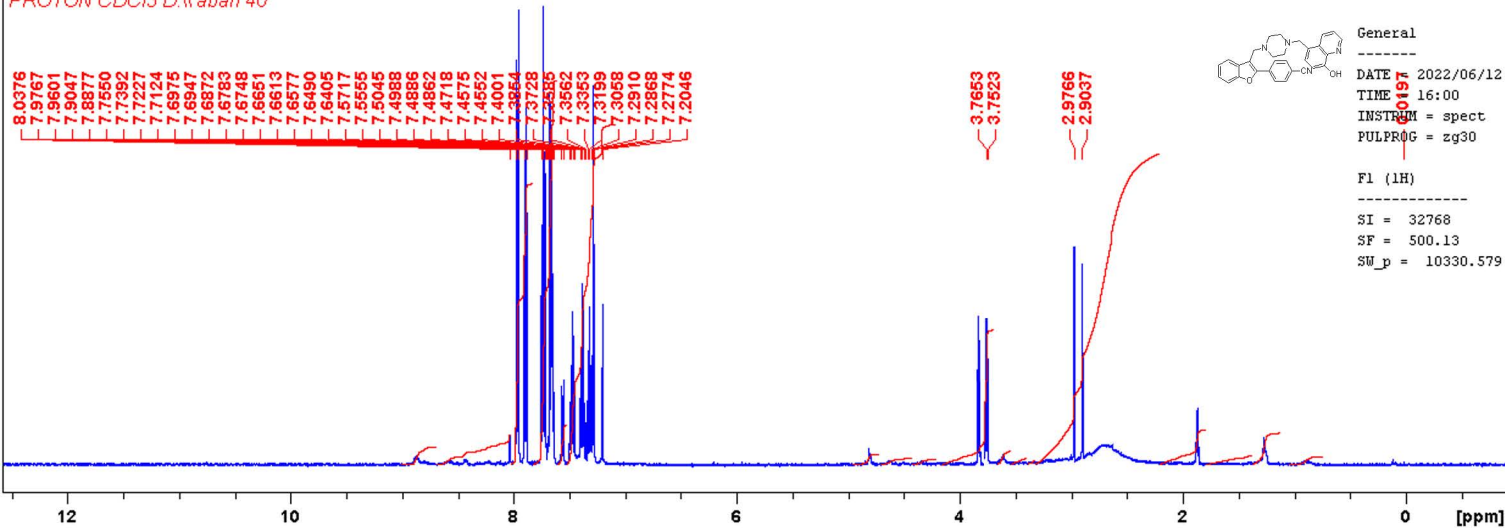

PROTON CDCl3 D:\labari 41

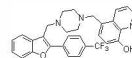

General

DATE = 2022/06/12

TIME = 16:07

INSTRUM = spect

PULPROG = zg30

F1 (1H)

SI = 32768

SF = 500.13

SW\_p = 10330.579

8.0467  
7.9998  
7.9833  
7.9628  
7.9465  
7.8515  
7.8351  
7.7335  
7.7169  
7.7023  
7.6874  
7.6693  
7.6636  
7.6527  
7.6475  
7.6376  
7.6179  
7.6013  
7.5815  
7.5653  
7.5365  
7.5207  
7.5084  
7.4980  
7.4930  
7.4810  
7.4649  
7.4498  
7.3771  
7.3621  
7.3535  
7.3459  
7.3384  
7.3232  
7.3044  
7.2871  
7.2747  
7.1683  
6.9959

3.7892  
3.7767  
3.7641  
2.9811  
2.9124

0.0312

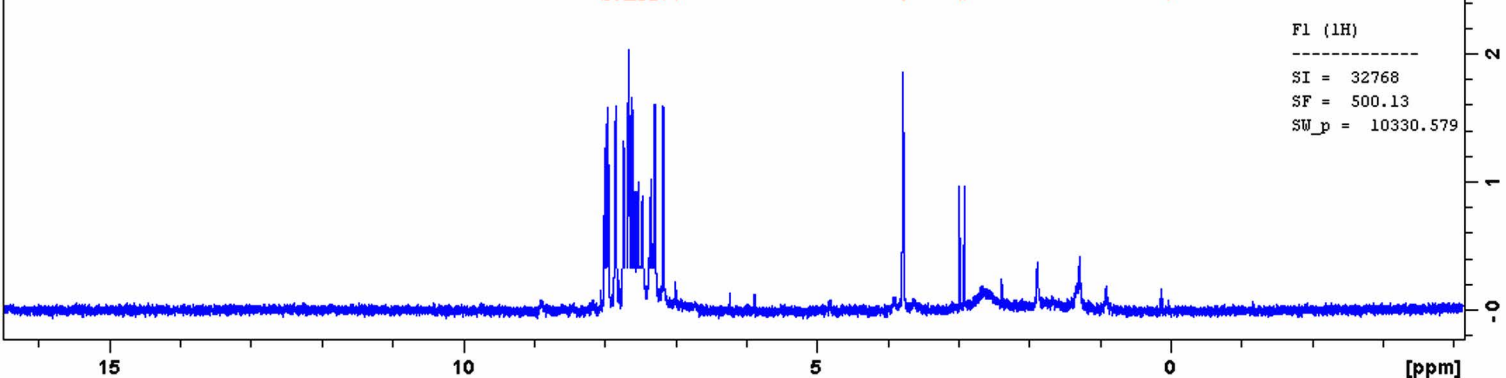



PROTON CDCl<sub>3</sub> D:\labari 43

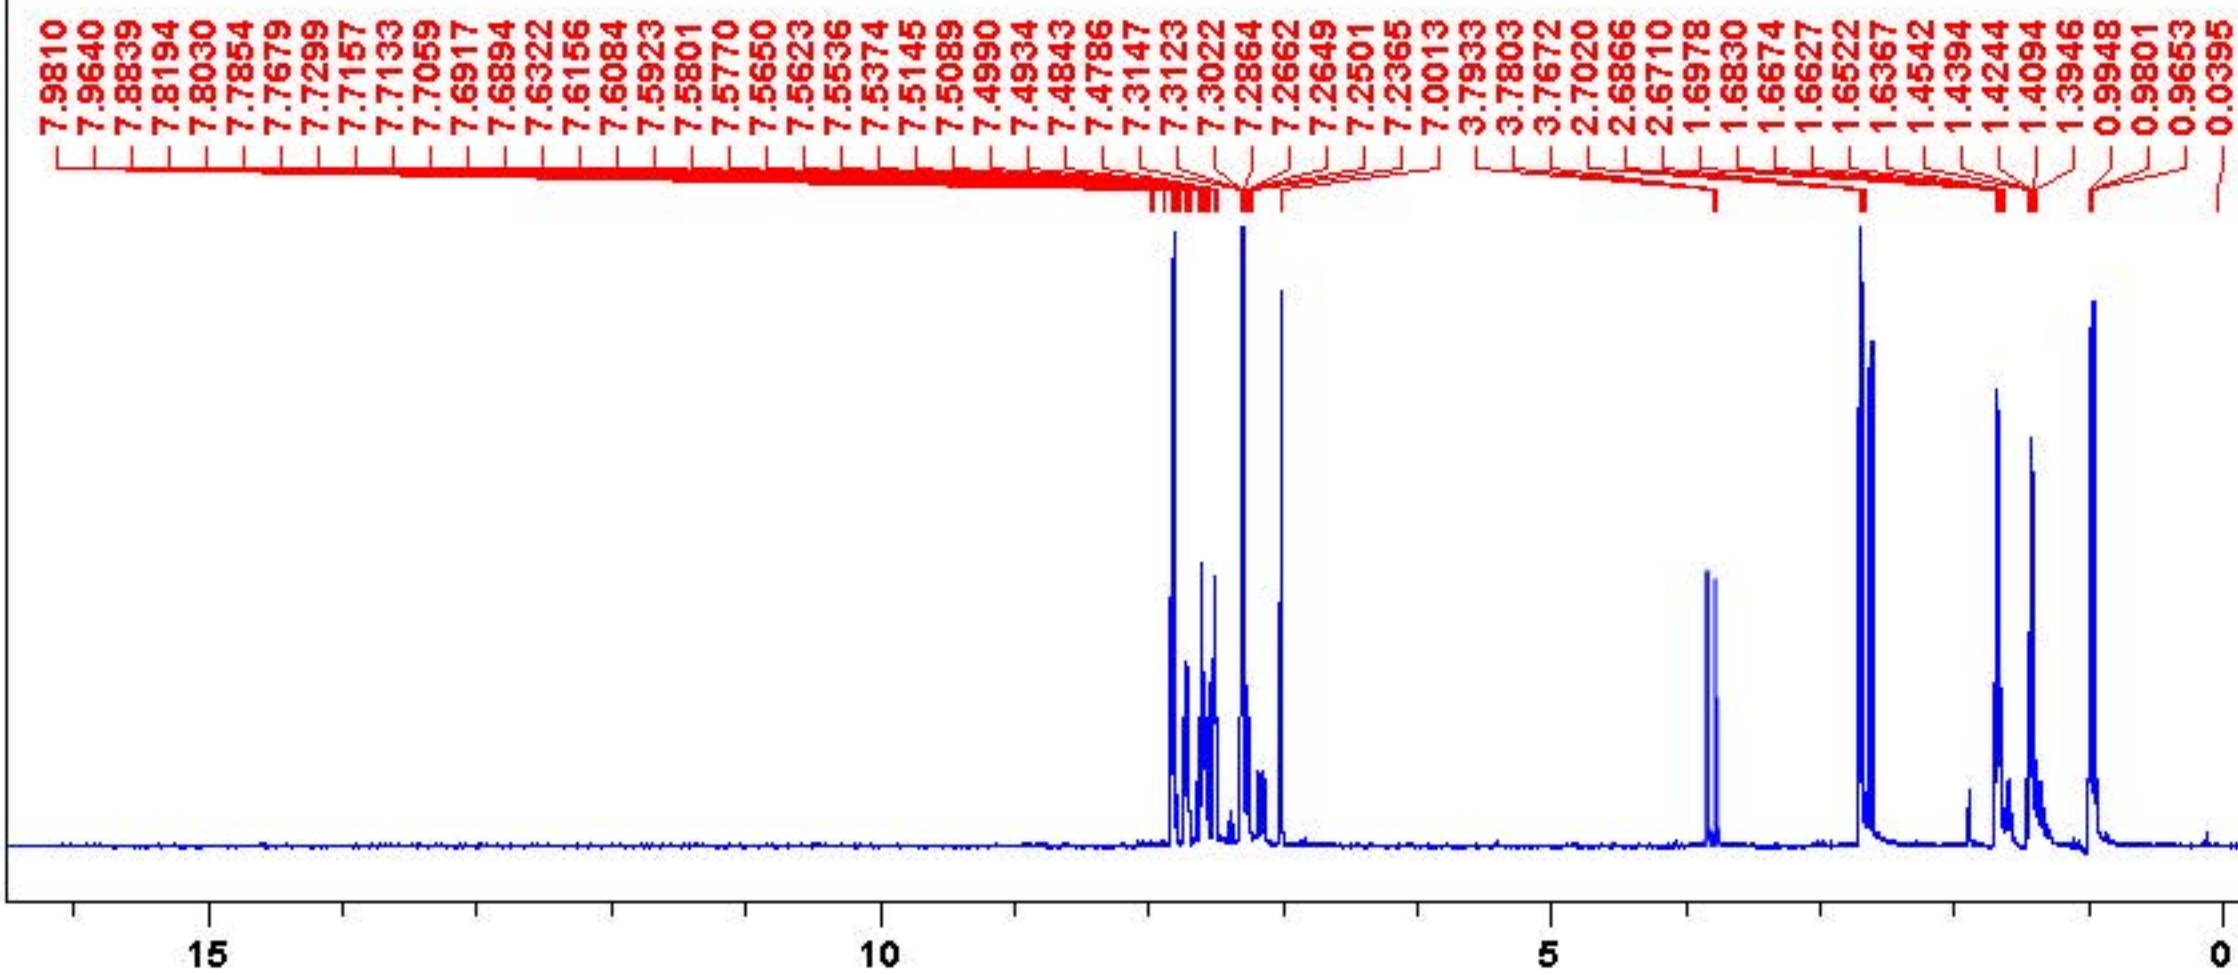

General

DATE = 2022/06/12

TIME = 16:22

INSTRUM = spect

PULPROG = zg30

F1 (1H)

SI = 32768

SF = 500.13

SW\_p = 10330.579

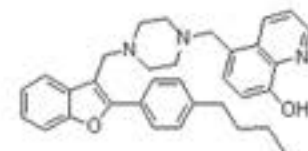



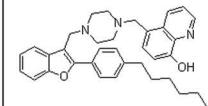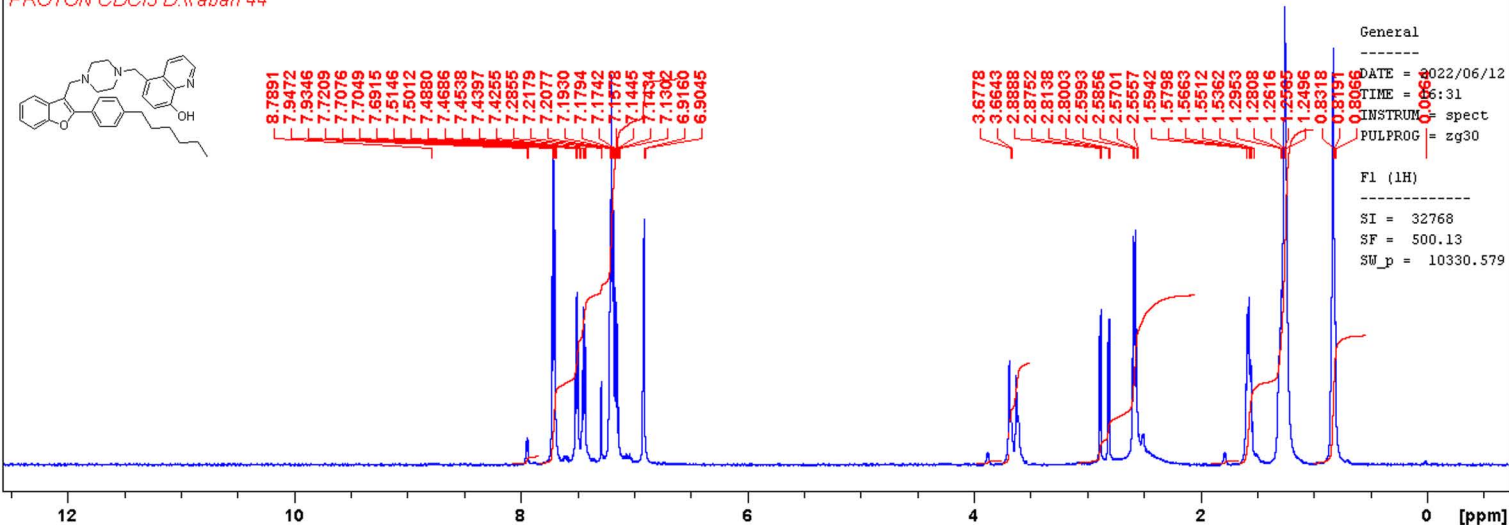

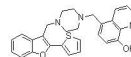

General

DATE = 2022/06/12  
TIME = 16:14  
INSTRUM = spect  
PULPROG = zg30

F1 (1H)

SI = 32768  
SF = 500.13  
SW\_p = 10330.579

[rel]

6

4

2

0

[ppm]

8.0701  
8.0440  
7.7609  
7.7521  
7.7400  
7.7191  
7.7046  
7.6953  
7.6807  
7.6408  
7.6337  
7.5873  
7.5708  
7.5628  
7.5474  
7.5092  
7.5040  
7.4939  
7.4888  
7.4732  
7.4633  
7.3900  
7.3750  
7.3598  
7.2871  
7.2729  
7.2581  
7.1053  
7.0952  
7.0871  
7.0773  
6.8954  
3.7854  
3.7723  
3.7597  
3.7375  
3.5264  
3.5125  
3.4985  
3.4845  
2.9773  
2.9079

0.0282

15

10

5

0
